# Supplementary material
Source: MDPI journal article supplement (https://www.mdpi.com/2073-4344/12/12/1669)
Supplement: s1 [file s1]

## Supplementary materials

# M-Single Atoms Embedded in the Surface of Pt Nanocatalysts: the Effect of Temperature and Hydrogen Pressure

Qing Wang <sup>1,\*†</sup>, Beien Zhu <sup>2</sup>, Frederik Tielens <sup>3,\*</sup> and Hazar Guesmi <sup>1,\*</sup>

1 ICGM, Univ. Montpellier, CNRS, ENSCM, Montpellier, France

2 Shanghai Institute of Applied Physics, Chinese Academy of Sciences, Shanghai 201800, China

3 Research Group of General Chemistry (ALGC) – Materials Modelling Group, Vrije Universiteit Brussel, Pleinlaan 2, 1050 Brussel, Belgium

\* Correspondence: qing.wang@ens-lyon.fr (Q.W.); frederik.tielens@vub.be (F.T.); hazar.guesmi@umontpellier.fr (H.G.)

† Current address: ENSL, CNRS, Laboratoire de Chimie UMR 5182, 46 Allée d'Italie, 69364 Lyon, France

### I. Evolution of hydrogen coverage and interface tension on Pt surfaces

Under 0.1 bar ( $10^4$  Pa) of hydrogen pressure (**Figure S1**), the coverage of hydrogen on the three facets is almost equal until temperature of 600K. Above this temperature, the coverage of hydrogen over (111) facets highly decrease while 0.9 ML of hydrogen covers the (100) and the (110) facets for temperature as high as 1000K. The fraction of (110) facets is found dominate for the studied temperature range.

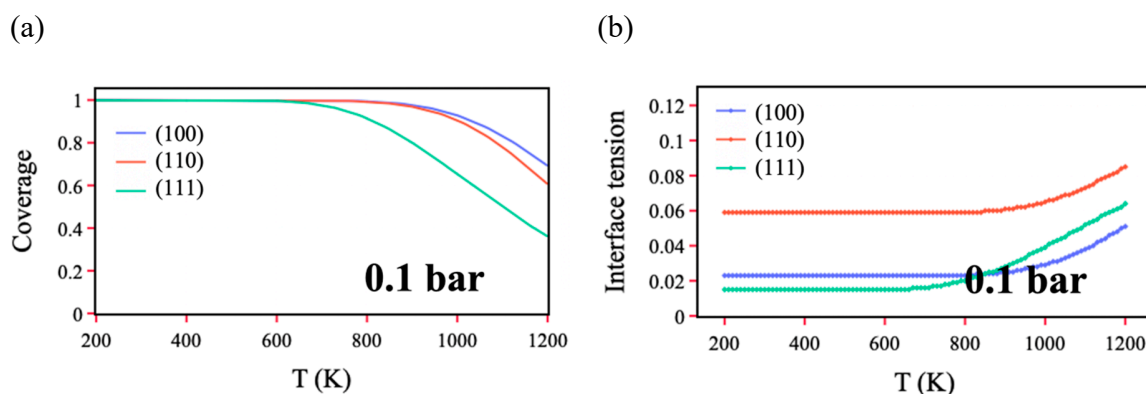

**Figure S1.** (a) evolution of hydrogen coverage as a function of temperature at pressure of 0.1 bar on (111), (110) and (100). (b) Pt interface tension evolution profiles of (111), (110) and (100) surface of Pt-NP constructed by MSR model as functions of temperature under 0.1 bar of hydrogen pressure.

## **II. Mapped environmental segregation energies $E_{seg}$ of single-atoms M embedded in Pt(111), Pt(100) and Pt(110) host surfaces as function of temperature and H<sub>2</sub> pressure**

The segregation trend of 8 M-promoted Pt systems (with M: Cu, Ag, Au, Ni, Pd, Co, Rh and Ir) under hydrogen reaction condition were evaluated under the temperature range covering [200 K - 1200 K] and the pressure range [1 Pa -  $10^6$  Pa]. The counter plots of environmental segregation energy  $E_{seg}$  in the three main facets of (111), (100) and (110) Pt surfaces are reported in **Figure S2**. The results are reported for each M transition metal group: M-single atom from coinage group (i.e. Cu, Ag, Au), Figure S2A, from nickel group (Ni, Pd), Figure S2B, and from the cobalt group (Co, Rh, Ir), Figure S2C.

The color code of the counter plots is defined as follows: positive values of  $E_{seg}$  superior to +0.7eV (dark blue), between +0.7eV and +0.3eV (light blue) and between +0.3eV and +0.05eV (aqua) represent the ‘very strong’, ‘strong’ and ‘weak’ bulk segregation of single-atom M, respectively. The negative values of  $E_{seg}$  inferior to -0.7 eV (red), between -0.3eV and -0.7 eV (orange) and between -0.05 eV and -0.3 eV (yellow) represent the ‘very strong’, ‘strong’ and ‘weak’ surface segregation of M-single atom, respectively. When  $E_{seg}$  is between -0.05eV and +0.05eV

(light green), single-atom M is considered as stable on the surface as in the bulk (no segregation preference).

A)

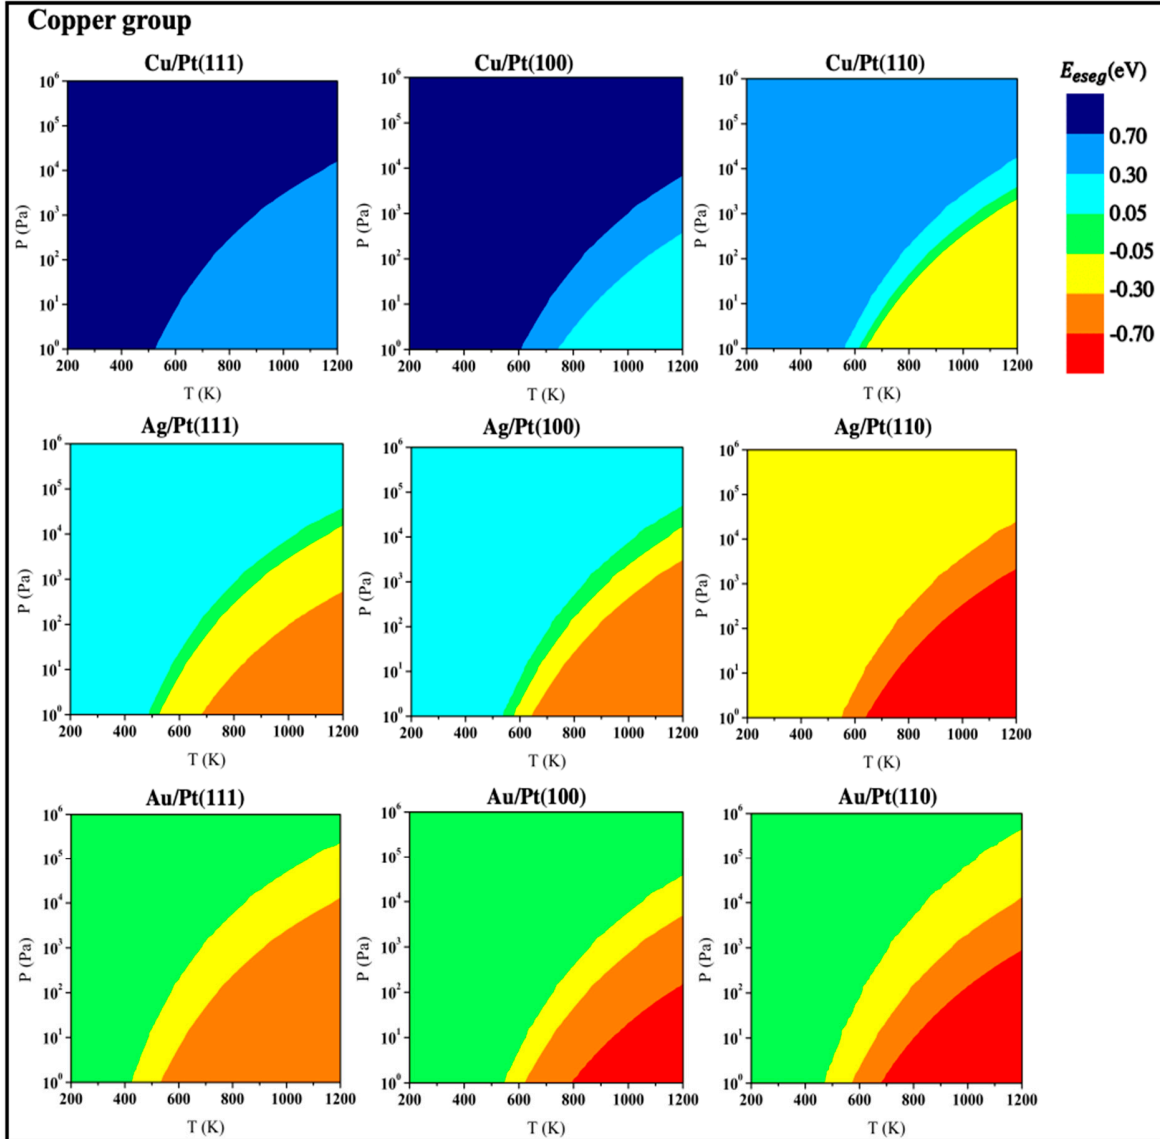

B)

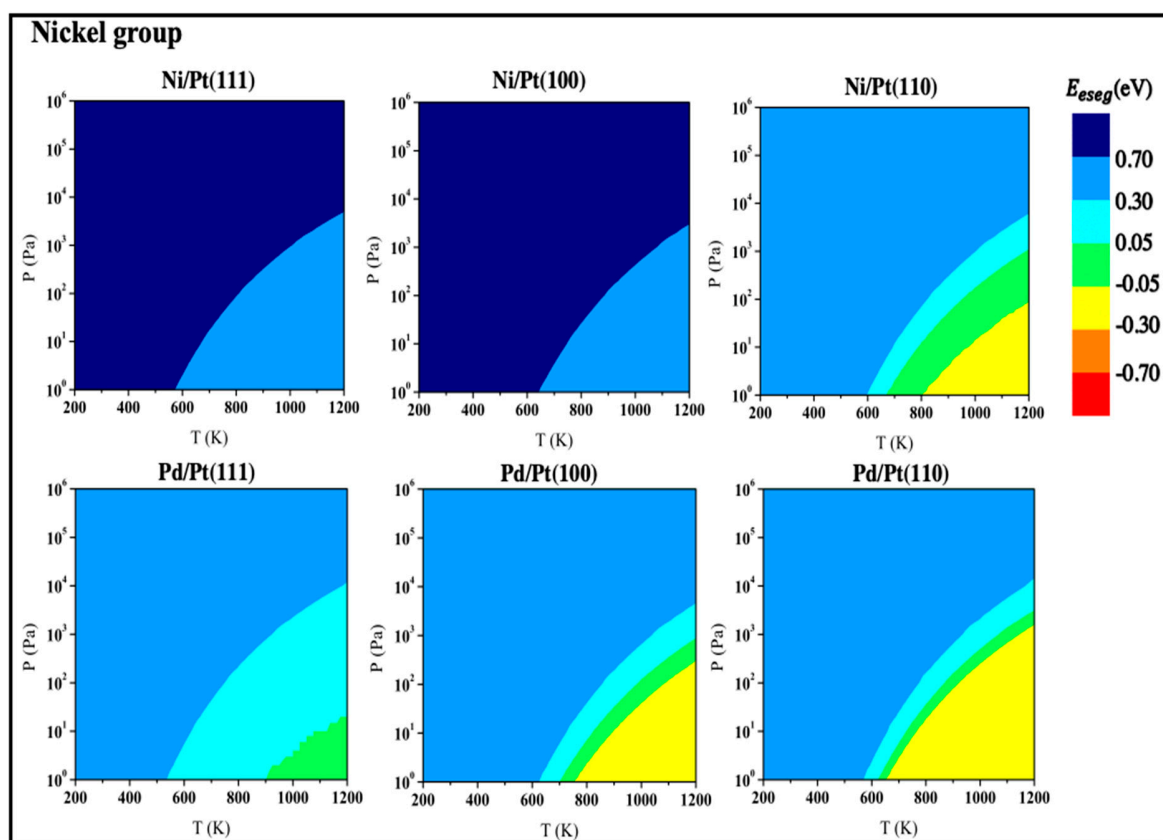

C)

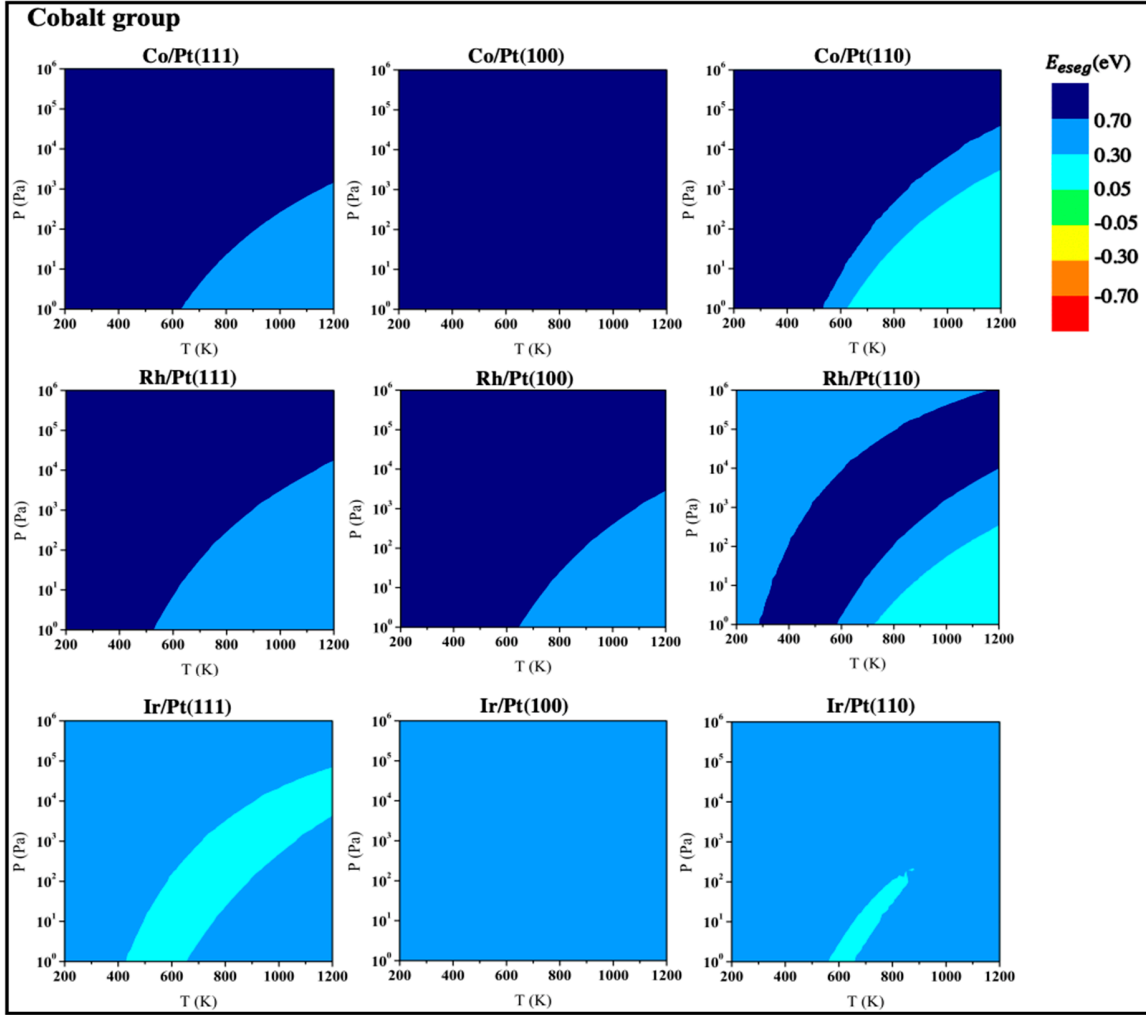

**Figure S2: Mapped environmental  $E_{eseg}$  of single-atoms M embedded in Pt(111), Pt(100) and Pt(110) host surfaces as function of temperature (T) and  $H_2$  pressure (P). (A) copper group: M = Cu, Ni, Co. (B) Nickel group: M = Ni, Pd. (C) Cobalt group: M = Co, Rh, Ir.**

### III. All DFT calculated pre-requisite parameters for the calculation of environmental segregation energies of M-single atoms embedded in Pt host surfaces

**Table S1.** Segregation energy in vacuum  $E_{seg}$ , binding energy between adsorbed H and M-single atom  $BE_{SA}$ , binding energy between adsorbed H and the host Pt surface  $BE_{host}$ , the lateral interaction between H zw, on (111), (100) and (110) surfaces representing the main facets of Pt NPs. All data are used to calculate the  $E_{eseg}$  evolution as a function of temperature and hydrogen pressure.

| SA/Host           | $E_{seg}(\text{eV})$ | $BE_{sol}(\text{eV})$ | $BE_{host}(\text{eV})$ | $zw(\text{eV})$ |
|-------------------|----------------------|-----------------------|------------------------|-----------------|
| <b>M/Pt(111)</b>  |                      |                       |                        |                 |
| <b>Cu/Pt</b>      | 0.42                 | 0                     | -0.70                  | -0.13           |
| <b>Ag/Pt</b>      | -0.33                | 0                     | -0.70                  | -0.13           |
| <b>Au/Pt</b>      | -0.56                | 0                     | -0.70                  | -0.13           |
| <b>Ni/Pt</b>      | 0.53                 | -0.070                | -0.70                  | -0.13           |
| <b>Pd/Pt</b>      | 0.049                | -0.16                 | -0.70                  | -0.13           |
| <b>Co/Pt</b>      | 0.63                 | 0                     | -0.70                  | -0.13           |
| <b>Rh/Pt</b>      | 0.43                 | -0.43                 | -0.70                  | -0.13           |
| <b>Ir/Pt</b>      | 0.47                 | -0.79                 | -0.70                  | -0.13           |
| <b>M/Pt (100)</b> |                      |                       |                        |                 |
| <b>Cu/Pt</b>      | 0.21                 | 0                     | -0.84                  | -0.063          |
| <b>Ag/Pt</b>      | -0.66                | 0                     | -0.84                  | -0.063          |
| <b>Au/Pt</b>      | -0.74                | 0                     | -0.84                  | -0.063          |
| <b>Ni/Pt</b>      | 0.35                 | -0.049                | -0.84                  | -0.063          |
| <b>Pd/Pt</b>      | -0.12                | -0.078                | -0.84                  | -0.063          |
| <b>Co/Pt</b>      | 1.011                | -0.49                 | -0.84                  | -0.063          |
| <b>Rh/Pt</b>      | 0.36                 | -0.37                 | -0.84                  | -0.063          |
| <b>Ir/Pt</b>      | 0.51                 | -0.81                 | -0.84                  | -0.063          |
| <b>M/Pt (110)</b> |                      |                       |                        |                 |
| <b>Cu/Pt</b>      | -0.24                | 0                     | -0.76                  | -0.0051         |

|              |        |        |       |         |
|--------------|--------|--------|-------|---------|
| <b>Ag/Pt</b> | -0.89  | 0      | -0.76 | -0.0051 |
| <b>Au/Pt</b> | -0.79  | -0.013 | -0.76 | -0.0051 |
| <b>Ni/Pt</b> | -0.060 | -0.021 | -0.76 | -0.0051 |
| <b>Pd/Pt</b> | -0.20  | -0.13  | -0.76 | -0.0051 |
| <b>Co/Pt</b> | 0.058  | 0      | -0.76 | -0.0051 |
| <b>Rh/Pt</b> | 0.26   | -0.38  | -0.76 | -0.0051 |
| <b>Ir/Pt</b> | 0.51   | -0.83  | -0.76 | -0.0051 |

#### IV. Binding hydrogen energies

**Table S2. Hydrogen binding energy comparison between M-single atoms embedded in Pt-host surfaces Pt(1 0 0) and neighboring Pt-sites ( free from hydrogen).** Pure Pt-host surfaces are added as reference. Unfavorable (endothermic) binding energies are fixed to 0 and reported in red color to facilitate the comparisons.

| adsorption energies of H in (eV) |                       |       |                     |
|----------------------------------|-----------------------|-------|---------------------|
| Pt(100)                          |                       | -0.84 |                     |
| M- Single atom                   | ads. on M-single atom |       | ads on Pt neighbour |
| Coinage group                    | Cu                    | 0     | -0.65               |
|                                  | Ag                    | 0     | -0.65               |
|                                  | Au                    | 0.    | -0.62               |
| Nickel group                     | Ni                    | -0.05 | -0.63               |
|                                  | Pd                    | -0.08 | -0.64               |
| Cobalt group                     | Co                    | -0.49 | -0.63               |
|                                  | Rh                    | -0.37 | -0.72               |

|           |       |       |
|-----------|-------|-------|
| <b>Ir</b> | -0.81 | -0.64 |
|-----------|-------|-------|

**Table S3. Hydrogen binding energy comparison between M-single atoms embedded in Pt-host surfaces Pt(1 1 0) and neighboring Pt-sites ( free from hydrogen). Pure Pt-host surfaces are added as reference.**

| Adsorption energies of H atom in (eV) |                              |                           |       |
|---------------------------------------|------------------------------|---------------------------|-------|
| <b>Pt(1 1 0)</b>                      |                              | <b>-0.76</b>              |       |
| <b>M-single atom in Pt(110)</b>       | <b>ads. on M-single atom</b> | <b>ads on neighbor Pt</b> |       |
| <b>Coinage group</b>                  | <b>Cu</b>                    | 0                         | -0.80 |
|                                       | <b>Ag</b>                    | 0                         | -0.82 |
|                                       | <b>Au</b>                    | -0.01                     | -0.79 |
| <b>Nickel group</b>                   | <b>Ni</b>                    | -0.02                     | -0.78 |
|                                       | <b>Pd</b>                    | -0.13                     | -0.78 |
|                                       | <b>Co</b>                    | 0                         | -0.77 |
| <b>Cobalt group</b>                   | <b>Rh</b>                    | -0.38                     | -0.83 |
|                                       | <b>Ir</b>                    | -0.83                     | -0.71 |



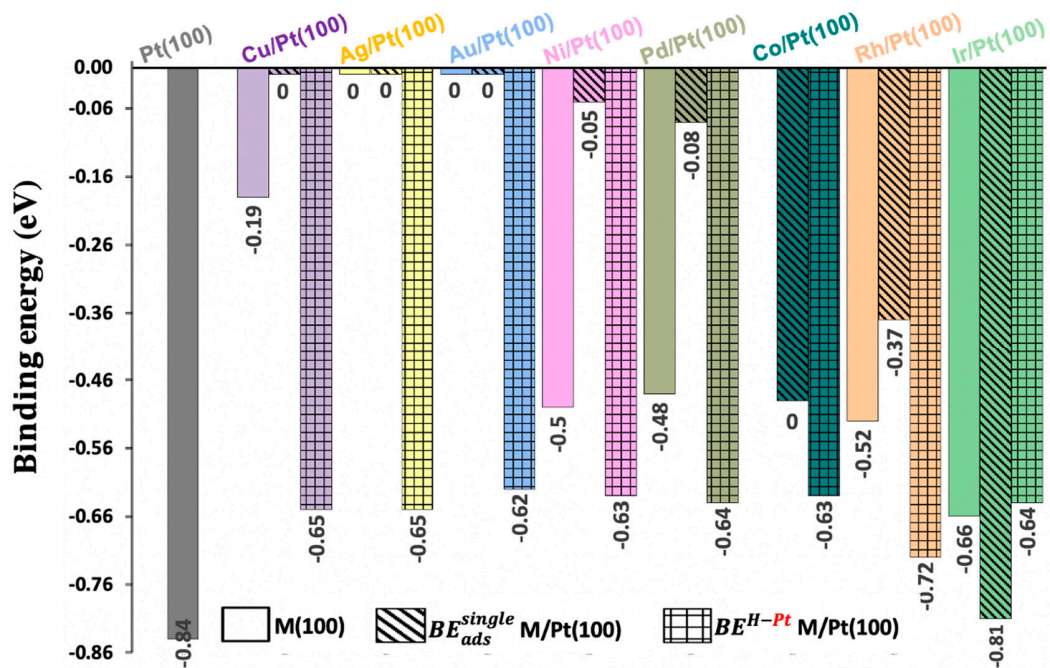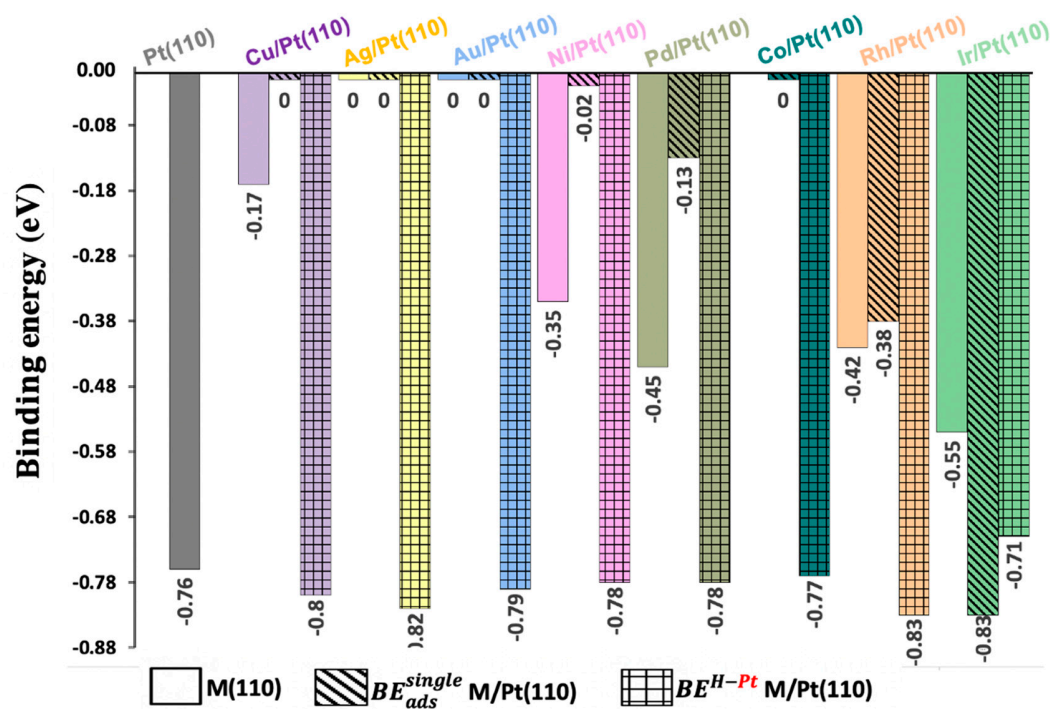

Figure S3. Hydrogen binding energy on M-single atoms embedded in Pt-host surfaces (A) for (100) and (B) for (110) surfaces. ( $BE_{ads}^{SA}$ , histograms filled with diagonal lines) and on

the neighboring Pt-site of M (with M free of hydrogen) ( $BE^{H-Pt}$ , histograms filled in cubic-grills). The binding energy of hydrogen atom on Pure Pt(1 0 0), Pt(110), M(1 0 0) and M(110) surfaces are added for comparison. Unfavorable (endothermic) binding energy values are fixed at 0 eV.
